# Supplementary material
Source: publisher site journal article supplement (https://static.cambridge.org/content/id/urn:cambridge.org:id:article:S136898001900404X/resource/name/S136898001900404Xsupp001.pdf)
Supplement: Supplementary file 1 [file S136898001900404Xsupp001.pdf]

| Issue identified                                                                                                                                                                                                                                                                                                                       | Adaptation made                                                          | Original SFS Example                                                                                                | SFS-ECEC Example                                                                                                                                                                                                                                                                                          |
|----------------------------------------------------------------------------------------------------------------------------------------------------------------------------------------------------------------------------------------------------------------------------------------------------------------------------------------|--------------------------------------------------------------------------|---------------------------------------------------------------------------------------------------------------------|-----------------------------------------------------------------------------------------------------------------------------------------------------------------------------------------------------------------------------------------------------------------------------------------------------------|
| Children are enrolled in childcare for differing numbers of days per week. A reference period of one week would not be sufficient to assess usual intake for a child attending only one day per week.                                                                                                                                  | Change in reference period for capturing ‘usual’ intake                  | Reference period was specified as over the last week                                                                | Reference period was specified as over the last month                                                                                                                                                                                                                                                     |
| Paper-based survey administration (deemed most pragmatic for the current study setting) required flexibility in frequency response options to accommodate: a) children attending care less frequently than 5 days per week, b) foods that may not be served weekly; and c) the potential for an item to not be provided by the service | Change in frequency response options based on food groups being assessed | Response options for all food groups:<br>- ___servings per day<br>- ___servings per week<br>- ___servings per month | Response options for fruit, vegetables, breads and cereals, dairy:<br>- ___times per day<br>- ___times per week<br>- doesn’t eat<br><br>Response options for meat and meat alternatives, and discretionary:<br>- ___times per week<br>- ___times per month<br>- doesn’t eat/never/not provided by service |

|                                                                                                                                         |                                                                                                                                                                          |                                                                             |                                                                                                                                                                                                                                                                                                |
|-----------------------------------------------------------------------------------------------------------------------------------------|--------------------------------------------------------------------------------------------------------------------------------------------------------------------------|-----------------------------------------------------------------------------|------------------------------------------------------------------------------------------------------------------------------------------------------------------------------------------------------------------------------------------------------------------------------------------------|
| Educators may not have knowledge of serving sizes for each food group, but are likely able to provide assessment of frequency of foods. | Change in terminology from ‘servings’ to ‘times’.                                                                                                                        | “How many servings of <food> does your child usually eat <per time frame>?” | “How many times does the child usually eat <food>?”                                                                                                                                                                                                                                            |
| Children are often served smaller serving sizes than adults, therefore one time may not be equivalent to one serving                    | <p>Inclusion of portion size questions to enable more accurate estimation of child servings</p> <p>For example, 1 portion = ½ AGHE serve (accounted for in analysis)</p> |                                                                             | <p>“When the child eats &lt;food&gt;, please estimate how much they would usually eat at one time (i.e. at one meal or snack).”</p> <p>Response options:</p> <ul style="list-style-type: none"> <li>- 1/2 portion</li> <li>- 1 portion</li> <li>- 2 portions</li> <li>- doesn’t eat</li> </ul> |
| Educators may not have knowledge of what foods belong in each individual food group                                                     | Addition of examples of foods within each food group                                                                                                                     |                                                                             | Salad vegetables - Includes green leafy and all raw salad vegetables e.g. cherry tomatoes, cucumber, capsicum, lettuce, celery, carrot, beetroot                                                                                                                                               |

|                                                                                                  |                                                                          |                                                                                                                                                                                                                                           |                                                                                                                                                                                                   |
|--------------------------------------------------------------------------------------------------|--------------------------------------------------------------------------|-------------------------------------------------------------------------------------------------------------------------------------------------------------------------------------------------------------------------------------------|---------------------------------------------------------------------------------------------------------------------------------------------------------------------------------------------------|
| Certain foods commonly served in childcare services are missing from the original SFS            | Items assessing consumption of 'missing' foods added                     |                                                                                                                                                                                                                                           | <p>“How many times does the child usually eat plain crackers and crispbreads?”</p> <p>“How many times does the child usually eat fish?”</p>                                                       |
| Certain foods included in SFS are not commonly served in childcare                               | Removed/merged redundant response options                                | <p>“What type of spread does your child usually have?”</p> <p>Response options:</p> <ul style="list-style-type: none"> <li>- butter</li> <li>- table margarine</li> <li>- unsaturated margarine</li> <li>- doesn't have spread</li> </ul> | <p>“What type of spread does the child usually have?”</p> <p>Response options:</p> <ul style="list-style-type: none"> <li>- butter</li> <li>- margarine</li> <li>- doesn't have spread</li> </ul> |
| Educators will require training and/or assistance to complete the tool as accurately as possible | 12 page supporting resource for educators developed by the research team |                                                                                                                                                                                                                                           | See Appendix B                                                                                                                                                                                    |
